# Supplementary material for: High-altitude Hypoxia Influences the Activities of the Drug-Metabolizing Enzyme CYP3A1 and the Pharmacokinetics of Four Cardiovascular System Drugs
Source: MDPI journal article supplement (doi:10.3390/ph15101303), 2022-10-21
Supplement: s1 [file s1]

**The qPCR raw data of CYP3A1**

|                                                      | CT<br>(CYP3A1) | CT<br>( $\beta$ -actin) | $\Delta$ CT | $\Delta\Delta$ CT | $-\Delta\Delta$ CT | $2^{-\Delta\Delta$ CT} | mean  | SD    |
|------------------------------------------------------|----------------|-------------------------|-------------|-------------------|--------------------|------------------------|-------|-------|
| normoxia<br>group                                    | 17.085         | 16.966                  | 0.12        | 0.42              | -0.42              | 0.75                   | 1.013 | 0.182 |
|                                                      | 17.345         | 17.619                  | -0.27       | 0.03              | -0.03              | 0.98                   |       |       |
|                                                      | 17.168         | 17.170                  | 0.00        | 0.30              | -0.30              | 0.81                   |       |       |
|                                                      | 16.101         | 16.434                  | -0.33       | -0.03             | 0.03               | 1.02                   |       |       |
|                                                      | 16.570         | 16.624                  | -0.05       | 0.25              | -0.25              | 0.84                   |       |       |
|                                                      | 17.239         | 17.661                  | -0.42       | -0.12             | 0.12               | 1.09                   |       |       |
|                                                      | 15.420         | 15.829                  | -0.41       | -0.11             | 0.11               | 1.08                   |       |       |
|                                                      | 15.896         | 16.664                  | -0.77       | -0.47             | 0.47               | 1.38                   |       |       |
|                                                      | 16.458         | 16.911                  | -0.45       | -0.15             | 0.15               | 1.11                   |       |       |
|                                                      | 16.613         | 16.995                  | -0.38       | -0.08             | 0.08               | 1.06                   |       |       |
| acute<br>hypoxia<br>group                            | 19.163         | 17.409                  | 1.75        | 2.05              | -2.05              | 0.24                   | 0.484 | 0.217 |
|                                                      | 16.959         | 17.004                  | -0.05       | 0.25              | -0.25              | 0.84                   |       |       |
|                                                      | 17.695         | 16.871                  | 0.82        | 1.12              | -1.12              | 0.46                   |       |       |
|                                                      | 17.530         | 17.312                  | 0.22        | 0.52              | -0.52              | 0.70                   |       |       |
|                                                      | 17.385         | 16.054                  | 1.33        | 1.63              | -1.63              | 0.32                   |       |       |
|                                                      | 17.686         | 16.641                  | 1.05        | 1.35              | -1.35              | 0.39                   |       |       |
|                                                      | 17.657         | 16.646                  | 1.01        | 1.31              | -1.31              | 0.40                   |       |       |
|                                                      | 16.851         | 16.739                  | 0.11        | 0.41              | -0.41              | 0.75                   |       |       |
|                                                      | 17.562         | 16.941                  | 0.62        | 0.92              | -0.92              | 0.53                   |       |       |
|                                                      | 18.955         | 16.963                  | 1.99        | 2.29              | -2.29              | 0.20                   |       |       |
| chronic<br>hypoxia<br>group                          | 19.386         | 17.834                  | 1.55        | 1.85              | -1.85              | 0.28                   | 0.357 | 0.094 |
|                                                      | 18.503         | 17.000                  | 1.50        | 1.80              | -1.80              | 0.29                   |       |       |
|                                                      | 18.734         | 17.065                  | 1.67        | 1.97              | -1.97              | 0.26                   |       |       |
|                                                      | 17.892         | 17.135                  | 0.76        | 1.06              | -1.06              | 0.48                   |       |       |
|                                                      | 17.961         | 17.036                  | 0.92        | 1.22              | -1.22              | 0.43                   |       |       |
|                                                      | 17.919         | 16.873                  | 1.05        | 1.35              | -1.35              | 0.39                   |       |       |
|                                                      | 18.273         | 17.370                  | 0.90        | 1.20              | -1.20              | 0.43                   |       |       |
|                                                      | 19.437         | 18.127                  | 1.31        | 1.61              | -1.61              | 0.33                   |       |       |
|                                                      | 19.413         | 17.552                  | 1.86        | 2.16              | -2.16              | 0.22                   |       |       |
|                                                      | 17.833         | 17.028                  | 0.80        | 1.10              | -1.10              | 0.47                   |       |       |
| chronic<br>hypoxia<br>return to<br>normoxia<br>group | 18.608         | 17.353                  | 1.26        | 1.56              | -1.56              | 0.34                   | 0.430 | 0.132 |
|                                                      | 18.116         | 17.540                  | 0.58        | 0.88              | -0.88              | 0.54                   |       |       |
|                                                      | 18.372         | 18.074                  | 0.30        | 0.60              | -0.60              | 0.66                   |       |       |
|                                                      | 17.946         | 16.875                  | 1.07        | 1.37              | -1.37              | 0.39                   |       |       |
|                                                      | 18.379         | 17.196                  | 1.18        | 1.48              | -1.48              | 0.36                   |       |       |
|                                                      | 17.900         | 16.880                  | 1.02        | 1.32              | -1.32              | 0.40                   |       |       |
|                                                      | 18.281         | 16.928                  | 1.35        | 1.65              | -1.65              | 0.32                   |       |       |
|                                                      | 18.127         | 16.720                  | 1.41        | 1.71              | -1.71              | 0.31                   |       |       |
|                                                      | 18.360         | 17.153                  | 1.21        | 1.51              | -1.51              | 0.35                   |       |       |
|                                                      | 17.248         | 16.881                  | 0.37        | 0.67              | -0.67              | 0.63                   |       |       |
