# Supplementary material for: High-altitude Hypoxia Influences the Activities of the Drug-Metabolizing Enzyme CYP3A1 and the Pharmacokinetics of Four Cardiovascular System Drugs
Source: Pharmaceuticals (Basel). 2022 Oct 21;15(10):1303. doi: 10.3390/ph15101303 (PMC9612038; doi:10.3390/ph15101303)
Supplement: Supplementary file 1 [file pharmaceuticals-15-01303-s001.zip › Table S2.xlsx]

## Sheet: normoxia group
	normoxia group
	1	2	3	4	5	6	7	8	9	10	mean	SD
White Blood Cell	6.93	6.72	7.03	9.71	9.38	4.49	2.5	6.32	4.16	5.8	6.304	2.23026
Hemoglobin	162	166	166	159	168	171	154	183	168	168	166.5	7.69199
Red Blood Cell	8.46	8.58	8.79	8.07	8.62	8.96	7.73	9.72	8.54	8.53	8.6	0.525653
Hematocrit	75.5	72.9	75.1	74.5	75.9	75.8	71	82.2	76	76.4	75.53	2.87443
Mean Corpuscular Volume	89.2	85	85.4	92.3	88.1	84.6	91.8	84.6	89	89.6	87.96	2.92126
Platelet count	1031	915	919	892	971	826	946	1247	908	1008	966.3	114.806
Mean Platelet Volume	9.3	8.9	9.4	9	8.6	8.9	8.7	9.4	8.7	9.1	9	0.294392
Alanine Aminotransferase	136.79	100.169	111.969	101.521	129.31	161.63	125.267	75.816	118.261	64.908	112.564	28.6086
Aspartate Aminotransferase	416.8	383.595	408.402	468.013	432.987	319.513	477.383	371.413	431.846	290.241	400.019	60.2592
Total Protein	72.676	68.887	72.708	76.01	68.657	65.359	77.272	70.072	69.801	64.473	70.5915	4.15226
Albumin	29.747	26.242	28.305	28.573	27.433	26.299	30.322	27.973	26.14	26.923	27.7957	1.46717
Globulin	42.929	42.645	44.403	47.437	41.224	39.06	46.95	42.099	43.661	37.55	42.7958	3.10199
Urea	8.168	9.806	10.166	8.457	9.533	9.93	8.952	6.939	9.004	10.491	9.1446	1.07545
Glucose	5.638	5.292	4.925	3.651	6.606	6.669	3.323	4.961	7.555	10.888	5.9508	2.17697

## Sheet: acute hypoxia
	acute hypoxia
	1	2	3	4	5	6	7	8	9	10	mean	SD
White Blood Cell	16.5	6.4	13.5	13.3	10.5	5.6	9.2	6.3	7	7.4	9.57	3.74464
Hemoglobin	194	169	178	179	196	204	193	179	196	170	185.8	12.2184
Red Blood Cell	9.64	9.28	8.49	9.95	9.29	9.33	9.08	9.76	9.74	9.45	9.401	0.417624
Hematocrit	51.4	45.5	47.2	47.8	52.6	53	50.7	48.1	52.1	45.9	49.43	2.84255
Mean Corpuscular Volume	62.5	63.8	62.5	62.6	62.8	57.2	63.2	63.8	66.4	66.4	63.12	2.55247
Platelet count	841	932	1088	1084	989	885	982	962	795	887	944.5	96.5001
Mean Platelet Volume	6.6	6.4	6.2	6.2	6.3	6.4	6.2	6.3	6.2	6.6	6.34	0.157762
Alanine Aminotransferase	54	32	47	43	51	48	65	35	49	46	47	9.30949
Aspartate Aminotransferase	169	143	176	177	147	142	182	165	146	108	155.5	22.6434
Total Protein	61.3	63.4	60	61.9	57.9	60.3	60.6	62.9	56.9	63.7	60.89	2.24868
Albumin	38.6	40.6	38.8	39.3	37.5	37	39.7	39.4	36.6	40	38.75	1.32853
Globulin	22.7	22.8	21.2	22.6	20.4	23.3	20.9	23.5	20.3	23.7	22.14	1.30911
Urea	5.6	3.1	8.9	8.8	6.2	7	11.1	4.9	5.63	6.8	6.803	2.29514
Glucose	10.8	7.56	9.74	8.43	9.26	7.92	11.4	11.4	8.07	9.89	9.447	1.43755

## Sheet: chronic hypoxia
	chronic hypoxia
	1	2	3	4	5	6	7	8	9	10	mean	SD
White Blood Cell	14.1	4.6	5.5	9.7	8	8.5	7.6	5.6	10	11.6	8.52	2.95025
Hemoglobin	222	233	210	236	270	223	217	226	242	229	230.8	16.6052
Red Blood Cell	11.54	10.48	11.15	10.43	11.9	10.48	10.14	11.75	11.01	10.57	10.945	0.618839
Hematocrit	56.7	60.3	53.4	60.09	57.91	56.7	56.9	57.7	61.4	57.8	57.89	2.28486
Mean Corpuscular Volume	58.9	65	62.9	61.1	61.07	61.5	62.7	59.2	63.1	61.2	61.667	1.83836
Platelet count	789	749	878	748	529	703	862	920	878	713	776.9	115.912
Mean Platelet Volume	7	6.7	6.4	7.4	8.2	6.6	7	7.1	6.6	7	7	0.514242
Alanine Aminotransferase	56	67	49	40	90	35	53	54	66	38	54.8	16.4843
Aspartate Aminotransferase	124	210	117	125	196	138	188	215	232	135	168	44.2568
Total Protein	68.7	60.4	71.2	60.5	67.6	58.7	59.3	59.6	58.7	60.7	62.54	4.70584
Albumin	38.3	35.1	40.4	36	38.9	33.2	35.9	34.4	34.1	36	36.23	2.29398
Globulin	30.4	25.7	30.8	24.5	28.7	25.5	23.4	25.2	24.6	24.7	26.35	2.62689
Urea	6.2	8	5.9	5.8	6.2	4.8	5.5	5.1	7.2	6	6.07	0.944046
Glucose	11.3	22.1	9.66	12	12.1	9.89	8.07	11.1	10.1	10.7	11.702	3.8457

## Sheet: chronic hypoxia to normoxia
	chronic hypoxia to normoxia groups
	1	2	3	4	5	6	7	8	9	10	mean	SD
White Blood Cell	16.73	10.78	3.94	8.69	4.05	6.98	11.41	7.15	6.34	4.04	8.011	4.0597
Hemoglobin	215	211	215	201	223	191	194	220	209	200	207.9	10.9286
Red Blood Cell	8.23	7.14	7.56	7.65	8.38	9.28	8.03	7.55	7.85	6.92	7.859	0.673704
Hematocrit	62.8	61.2	65.1	60.6	68.9	55.4	56.8	64.3	59.9	57.6	61.26	4.1452
Mean Corpuscular Volume	54.4	58.4	58.4	58.1	57.9	52.9	56	54.7	54.4	54.5	55.97	2.06023
Platelet count	1150	948	901	1271	812	1146	1061	1010	1086	1018	1040.3	133.502
Mean Platelet Volume	7.5	7.9	8	7.9	7.8	7.9	7.5	7.6	7.2	7.1	7.64	0.313404
Alanine Aminotransferase	39	52	39	60	165	49	28	72	29	44	57.7	40.0335
Aspartate Aminotransferase	150	201	166	206	504	196	152	147	191	169	208.2	106.253
Total Protein	65.4	57.2	68.9	59	70	57.4	57.5	59.8	57.5	54.5	60.72	5.3911
Albumin	35.4	35.9	35.9	33.2	39.7	32.9	33.2	35	33.5	32.1	34.68	2.22101
Globulin	30	21.3	33	25.8	30.3	24.5	24.3	24.8	24	22.4	26.04	3.78805
Urea	8.56	12.06	9.4	10.08	14.08	10.11	9.26	9.44	9.4	8.49	10.088	1.72453
Glucose	12.14	8.97	10.48	9.45	10.9	8.39	9.17	10.52	8.34	10.72	9.908	1.23487
