# Supplementary figures and images for: High-altitude Hypoxia Influences the Activities of the Drug-Metabolizing Enzyme CYP3A1 and the Pharmacokinetics of Four Cardiovascular System Drugs
Source: MDPI journal article supplement (doi:10.3390/ph15101303), 2022-10-21

The original pictures of western blotting as follows:

CYP3A1:

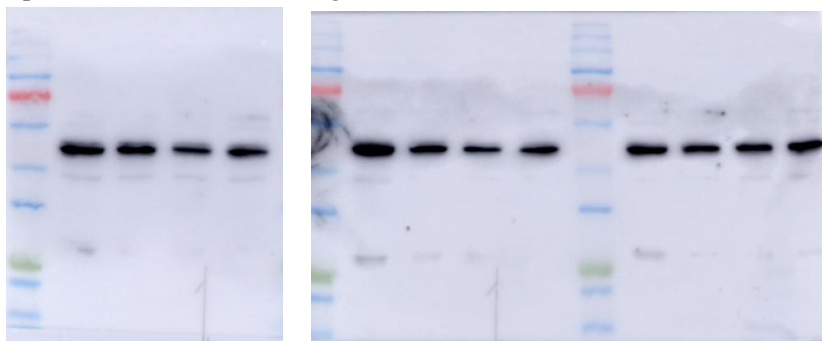

$\beta$ -actin:

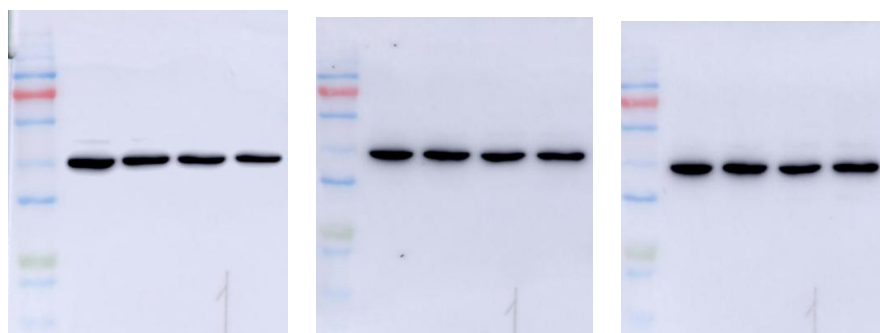

Supplement: s1 [file s1]
